# Supplementary material for: Tbx18 Orchestrates Cytostructural Transdifferentiation of Cardiomyocytes to Pacemaker Cells by Recruiting the Epithelial–Mesenchymal Transition Program
Source: PubMed Central journal article supplement — J Proteome Res. 2022 Aug 25;21(10):2277–92. doi: 10.1021/acs.jproteome.2c00133 (PMC9552783; doi:10.1021/acs.jproteome.2c00133), 2022-08-25
Supplement: pr2c00133_si_003.pdf [file pr2c00133_si_003.pdf]

## Supporting Information

### **Tbx18 Orchestrates Cytostructural Transdifferentiation of Cardiomyocytes to Pacemaker Cells by Recruiting the Epithelial-Mesenchymal Transition Program**

D. Brian Foster<sup>1,\*,‡,¥</sup>, Jin-mo Gu<sup>2,‡,¥</sup>, Elizabeth H. Kim<sup>3</sup>, David W. Wolfson, Robert O'Meally<sup>4</sup>,  
Robert N. Cole<sup>4</sup>, & Hee Cheol Cho<sup>5,\*</sup>

<sup>1</sup>Division of Cardiology, Department of Medicine, The Johns Hopkins University School of Medicine, Baltimore, MD, 21205

<sup>2</sup>Department of Pediatrics, Emory University, Atlanta, GA, 30322

<sup>3</sup>Cedars-Sinai Medical Center, Los Angeles, CA, 90048

<sup>4</sup>Proteomics Core Facility, The Johns Hopkins University School of Medicine, Baltimore, MD, 21205

<sup>5</sup>Department of Surgery, The Johns Hopkins University School of Medicine, Baltimore, MD, 21205

## Table of Contents

Figure S1. Transcriptome/Proteome Correlation

Figure S2. Inferred Upstream Regulation of Proteins by Gata4, Mef2, Tbx5, and Hand2

Supplement S1. Tbx18 Proteome.xlsx

Supplement S2. Tbx18 Transcriptome.xlsx

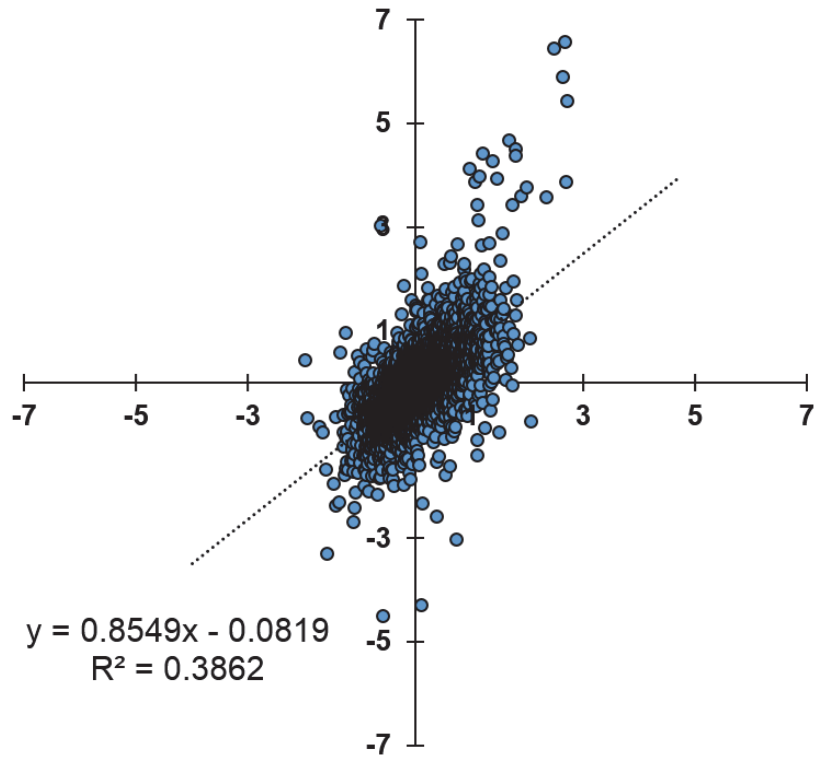

**Figure S1. Transcriptome/Proteome Correlation**

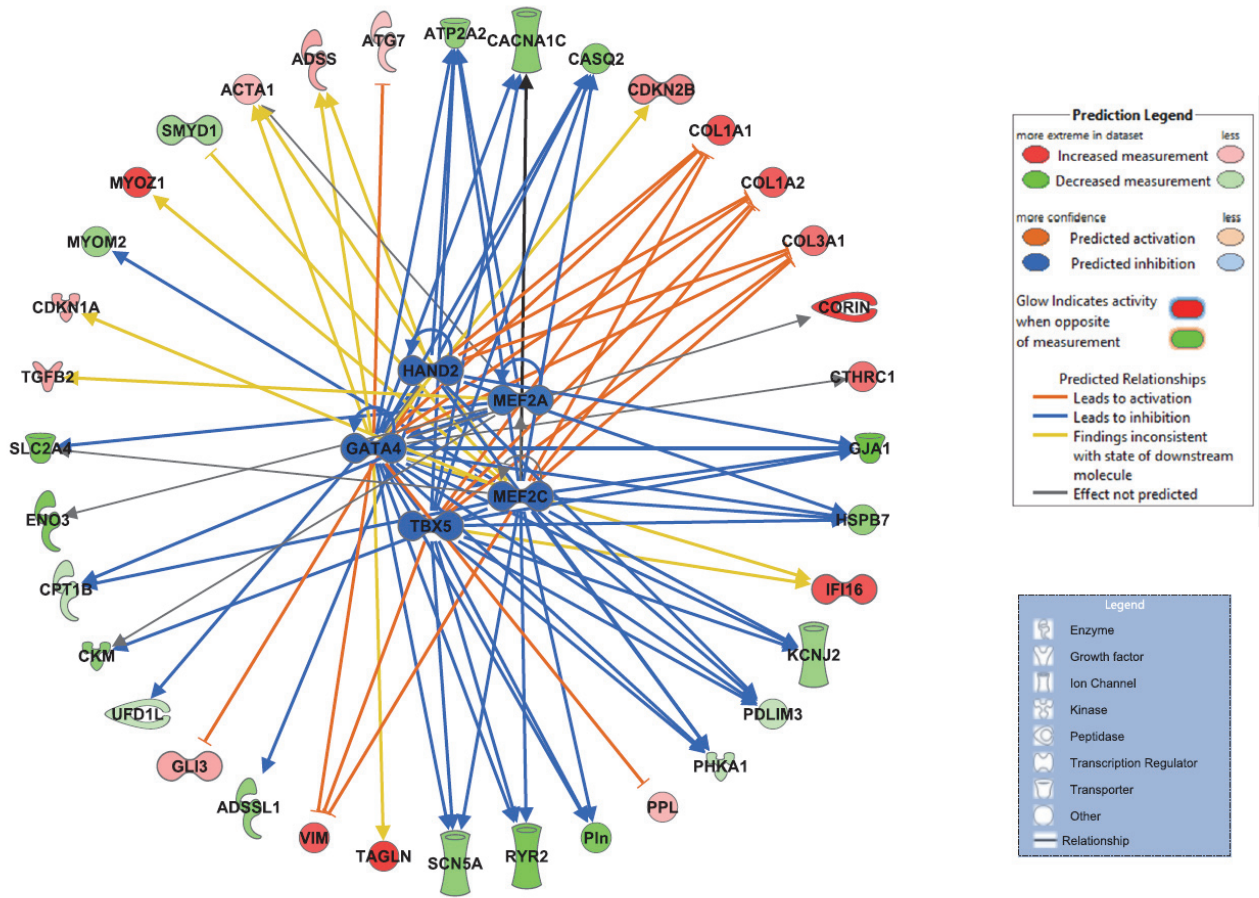

**Figure S2. Inferred Upstream Regulation of Proteins by Gata4, Mef2, Tbx5, and Hand2**
